# Supplementary material for: A novel δ-MnO2with carbon nanotubes nanocomposite as an enzyme-free sensor for hydrogen peroxide electrosensing
Source: Royal Society of Chemistry journal article supplement (doi:10.1039/c6ra08738h), 2016-01-01
Supplement: c6ra08738h1.pdf [file c6ra08738h1.pdf]

Supporting Information of

A novel  $\delta$ -MnO<sub>2</sub> with carbon nanotubes nanocomposites as enzyme-free sensor for  
hydrogen peroxide electroensing

Halima Begum, Mohammad Shamsuddin Ahmed, Seungwon Jeon\*

Department of chemistry and institute of basic science, Chonnam National University, Gwangju

500-757, Republic of Korea. Tel.: +82 62 530 0064; fax: +82 62 530 3389.

\*Corresponding author: [swjeon3380@naver.com](mailto:swjeon3380@naver.com)

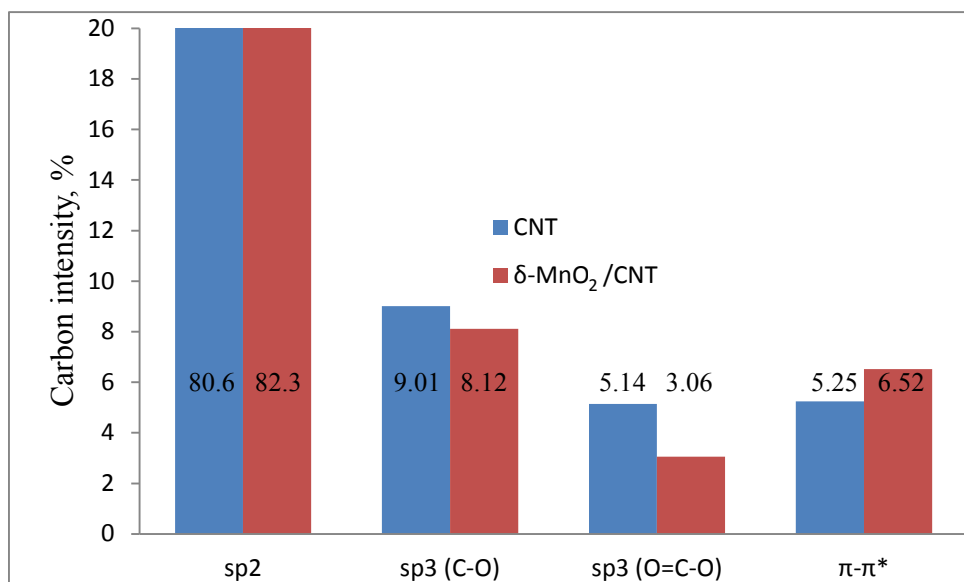

**Figure S1:** Distribution of carbon species obtained from the C1s peaks by XPS.

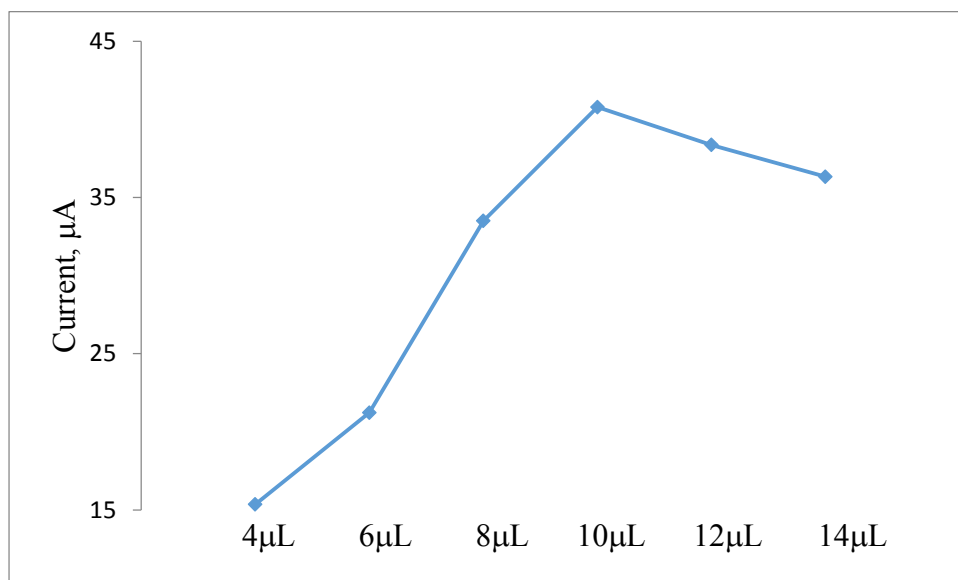

**Figure S2:** Plot of 1 mM H<sub>2</sub>O<sub>2</sub> current response vs. δ-MnO<sub>2</sub>/CNTs ink loading (μL) onto GCE by CVs in Ar-saturated 0.1 M PBS at 50 mV s<sup>-1</sup> scan rate.

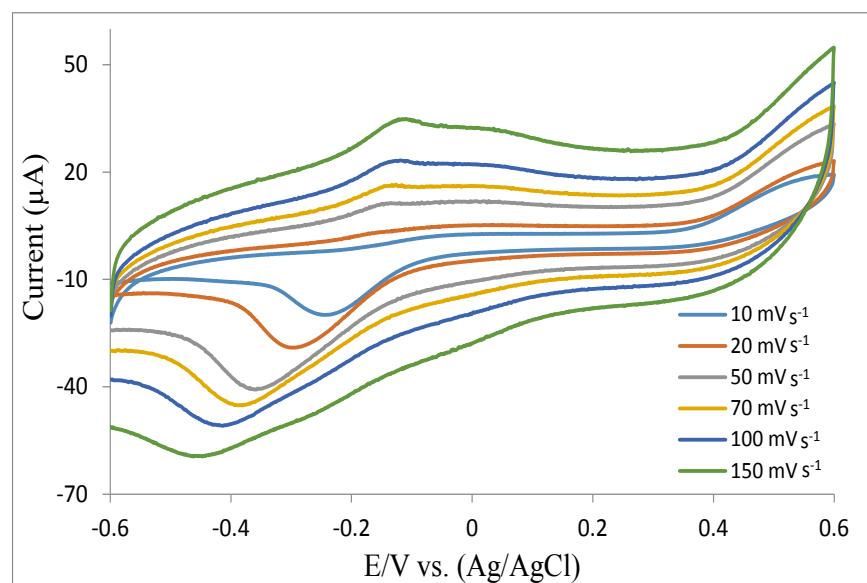

**Figure S3:** Scan rate dependent CVs recorded in Ar-saturated 0.1 M PBS at pH 7.4 on δ-MnO<sub>2</sub>/CNTs/GCE at 10 to 150 mV s<sup>-1</sup> scan rates.

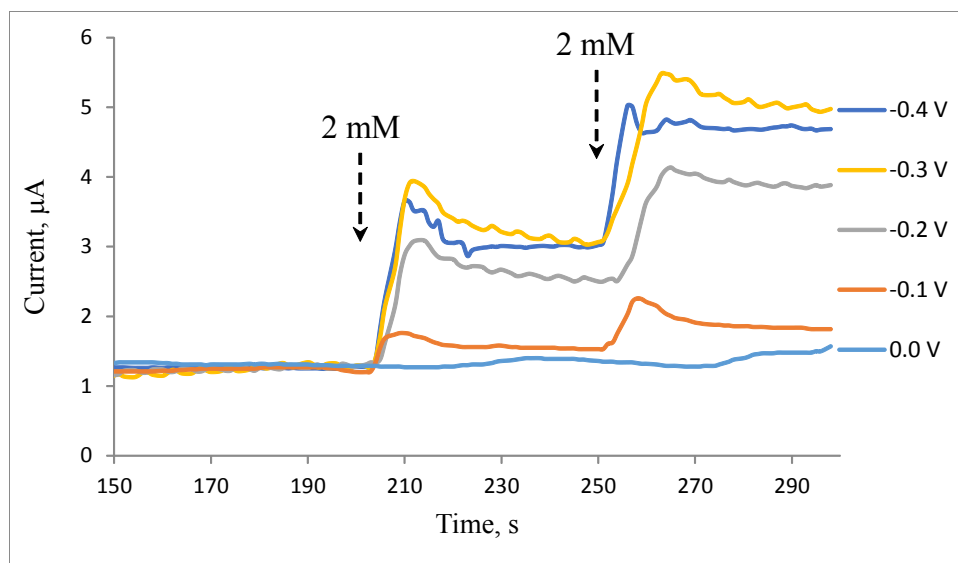

**Figure S4:** Amperometric response on  $\delta$ -MnO<sub>2</sub>/CNTs/GCE upon addition of 2 mM H<sub>2</sub>O<sub>2</sub> in Ar-saturated 0.1 M PBS at different applied potentials for applied potential optimization.

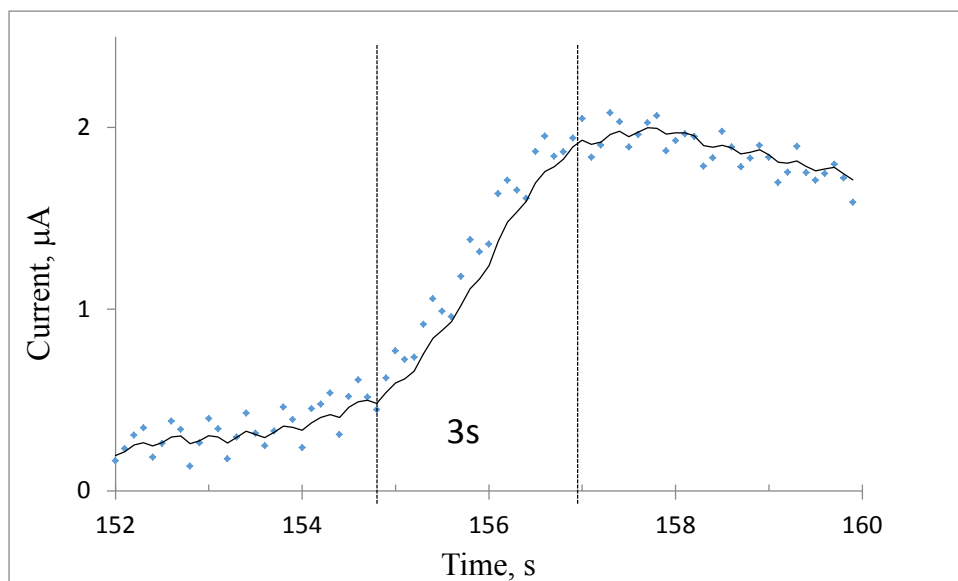

**Figure S5:** Enlarged amperometric response on  $\delta$ -MnO<sub>2</sub>/CNT/GCE upon addition H<sub>2</sub>O<sub>2</sub> in 0.1 M PBS at an applied potential of -0.3 V at cited time range.

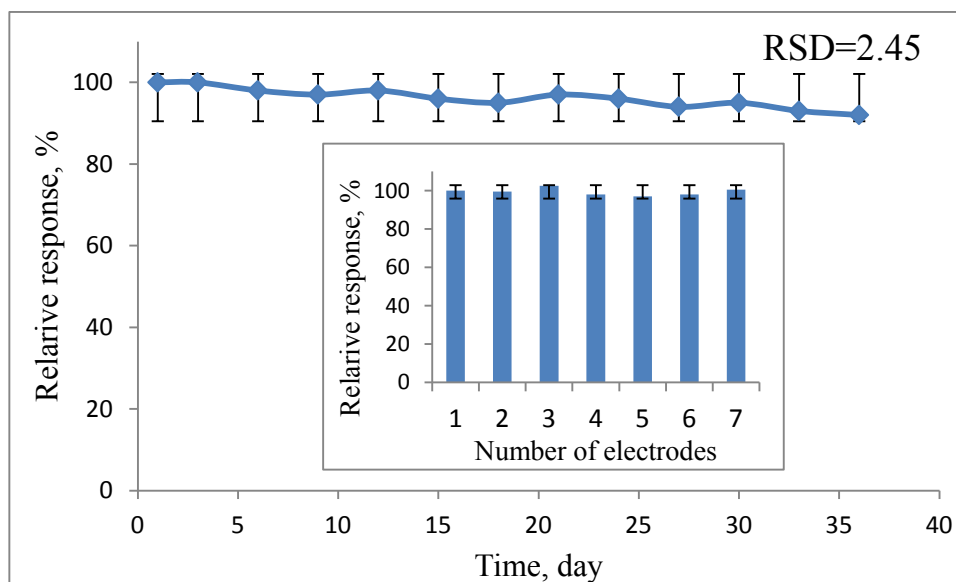

**Figure S6:** The stability and reproducibility of  $\delta\text{-MnO}_2/\text{CNT}/\text{GCE}$  by CVs response in Ar-saturated 0.1 M PBS with 1 mM  $\text{H}_2\text{O}_2$  at a scan rate of  $50 \text{ mV s}^{-1}$ ; inset: the reproducibility of seven different modified electrodes.

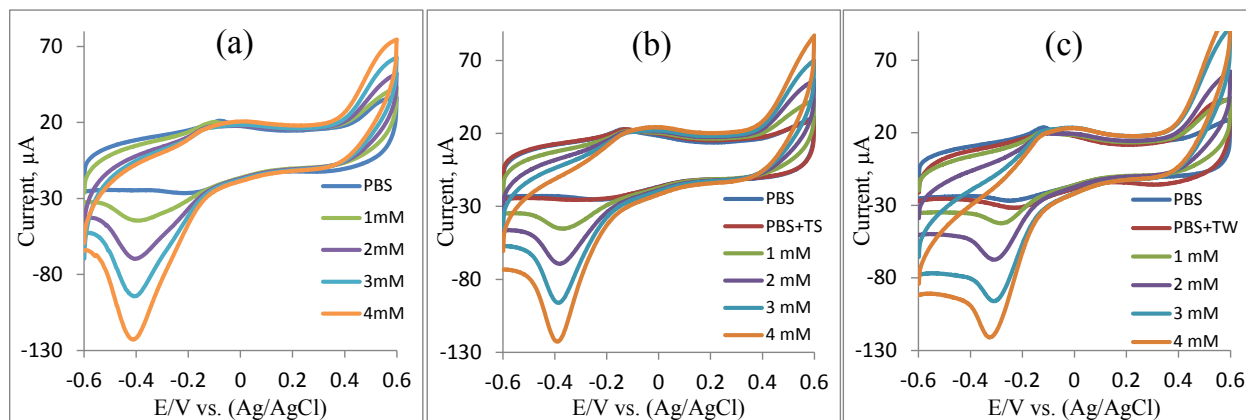

**Figure S7:** CVs response for real sample analysis on  $\delta\text{-MnO}_2/\text{CNT}/\text{GCE}$  in Ar-saturated 0.1 M PBS (a), 0.1 M PBS + Tomato sauce (TS) (b), and 0.1 M PBS + Tap water (TW) (c) with the subsequent addition of 1, 2, 3, 4 mM  $\text{H}_2\text{O}_2$  at a scan rate of  $50 \text{ mV s}^{-1}$ .
